1 **Three quantitative trait loci explain more than 60% of**  
2 **phenotypic variation for chill coma recovery time in *Drosophila***  
3 ***ananassae***

4 Annabella Königer\*, Saad Arif† and Sonja Grath\*

5 \* Division of Evolutionary Biology, Ludwig-Maximilians-Universität (LMU) München

6 82152 Planegg-Martinsried, Germany

7 † Department of Biological and Medical Sciences, Oxford Brookes University, Oxford,

8 OX3 0BP, United Kingdom

9

10

11

12

13 **Keywords:**

14 QTL mapping, RAD-Sequencing, cold tolerance, chill coma recovery time, *Drosophila*

15 *ananassae*

16

17 **Correspondence:**

18 Sonja Grath

19 LMU Biocenter, Großhaderner Straße 2, 82152 Planegg-Martinsried, Germany

20 [grath@bio.lmu.de](mailto:grath@bio.lmu.de)

21 Tel.: +49 (0)89 / 2180-74110

## 22 **Abstract**

23 Ectothermic species such as insects are particularly vulnerable to climatic fluctuations.  
24 Nevertheless, many insects that evolved and diversified in the tropics have successfully  
25 colonized temperate regions all over the globe. To shed light on the genetic basis of cold  
26 tolerance in such species, we conducted a quantitative trait locus (QTL) mapping  
27 experiment for chill coma recovery time (CCRT) in *Drosophila ananassae*, a cosmopolitan  
28 species that has expanded its range from tropical to temperate regions.

29 We created a mapping population of recombinant inbred advanced intercross lines (RIAILs)  
30 from two founder strains with diverging CCRT phenotypes. The RIAILs were phenotyped  
31 for their CCRT and, together with the founder strains, genotyped for polymorphic markers  
32 with double-digest restriction site-associated DNA (ddRAD) sequencing. Using a  
33 hierarchical mapping approach that combined standard interval mapping and a multiple-  
34 QTL model, we mapped three QTL which altogether explained 64% of the phenotypic  
35 variance. For two of the identified QTL, we found evidence of epistasis. To narrow down  
36 the list of cold tolerance candidate genes, we cross-referenced the QTL intervals with genes  
37 that we previously identified as differentially expressed in response to cold in *D.*  
38 *ananassae*, and with thermotolerance candidate genes of *D. melanogaster*. Among the 58  
39 differentially expressed genes that were contained within the QTL, *GF15058* showed a  
40 significant interaction of the CCRT phenotype and gene expression. Further, we identified  
41 the orthologs of four *D. melanogaster* thermotolerance candidate genes, *MtnA*, *klarsicht*,  
42 *CG5246* (*D.ana/GF17132*) and *CG10383* (*D.ana/GF14829*) as candidates for cold  
43 tolerance in *D. ananassae*.

## 44 **Introduction**

45 Temperature is one of the major factors that influence the geographical distribution and  
46 abundance of ectothermic species. Physiological mechanisms to regulate body temperature  
47 are usually limited in ectotherms and resilience towards temperature extremes often  
48 determines the species fate upon climate change or range expansion. *Drosophila* spp. have  
49 successfully mastered such thermal challenges as they colonized temperate regions all over  
50 the globe and are now present on all of the earth's continents except Antarctica (Lachaise et  
51 al., 1988). By far the most prominent example of the genus is *Drosophila melanogaster*,  
52 which originated in sub-Saharan Africa, colonized temperate regions after the last  
53 glaciation about 15,000 years ago and nowadays has a worldwide distribution (David and  
54 Capy, 1988; Stephan and Li, 2007). Cold tolerance in this species has a highly polygenic  
55 basis (von Heckel et al., 2016; MacMillan et al., 2016) and adaptation to local temperatures  
56 required simultaneous selection at multiple loci (Morgan and Mackay, 2006; Svetec et al.,  
57 2011).

58 Previously, we examined the cold tolerance of *Drosophila ananassae* (Königer and Grath,  
59 2018), a tropical species which originated in South-East-Asia (Das et al., 2004). During the  
60 past 18,000 years, *D. ananassae* expanded from its ancestral range to temperate regions and  
61 has nowadays a quasi-cosmopolitan distribution (Das et al., 2004; Tobar, 1993) We  
62 measured cold tolerance by means of a test for chill coma recovery time (CCRT), which is  
63 defined as the time the flies need to stand on their legs after a cold-induced coma (David et  
64 al., 1998). There was substantial variation in CCRT among fly strains that were derived  
65 from a population of the ancestral species range in Bangkok, Thailand (Königer and Grath,

66 2018). Most strikingly, the difference in the phenotype within this single population was  
67 large if compared to within-population variance in *D. melanogaster* (von Heckel et al.,  
68 2016). However, in *D. ananassae*, only two genes, *GF15058* and *GF14647*, reacted to the  
69 cold shock in a phenotype-specific, i.e., they showed a significant interaction of phenotype  
70 and genotype.

71 Here, we report the results of a genome-wide scan for quantitative trait loci (QTL)  
72 influencing CCRT in *D. ananassae*. To gain better insight into the genetic architecture of  
73 cold tolerance in this species, we generated a mapping population of recombinant inbred  
74 advanced intercross lines (RIAILs) from the most cold-tolerant strain and the most cold-  
75 sensitive strain of the Bangkok population. By combining double-digest restriction site-  
76 associated DNA sequencing (ddRAD) markers and a hierarchical mapping approach, we  
77 identified three QTL of large effect which altogether explain 64% of the variance in the  
78 phenotype. We further combined the present results with lists of genes that are differentially  
79 expressed in response to the cold shock in *D. ananassae* (Königer and Grath, 2018) and *D.*  
80 *melanogaster* (von Heckel et al., 2016).

81 Both species belong to the *Melanogaster* group and shared a common ancestor around 15-  
82 20 million years ago (Drosophila 12 Genomes Consortium et al., 2007). *D. melanogaster*  
83 expanded its range from Sub-Saharan Africa to temperate regions in Europe about 16,000  
84 years ago (Stephan and Li, 2007). Our approach allowed us to narrow down the list of  
85 potentially causal genes for cold tolerance and to uncover common evolutionary patterns  
86 among species from completely independent phylogenetic lineages that have expanded  
87 their thermal ranges and became successful human commensals.

## 88 **Materials and Methods**

### 89 **Mapping population**

90 All flies used in this study were raised on standard cornmeal molasses medium, at constant  
91 room temperature ( $22 \pm 1^\circ\text{C}$ ) and at a 14:10 h light:dark cycle (details of the food recipe  
92 can be found in (Königer and Grath, 2018)). The two fly strains (Fast and Slow) that were  
93 used as founders for the mapping population were collected in 2002 in Bangkok, Thailand,  
94 and established as isofemale strains (Das et al., 2004). Recombinant Inbred Advanced  
95 Intercross Lines (RIAILs) were generated as follows (Figure 1): two initial crosses between  
96 the two parental strains were set up (Fast males x Slow females and Slow males x Fast  
97 females). Individuals from both F1 generations were mixed and allowed to mate freely with  
98 each other. Up to generation F4, intercrossing was continued in the form of mass breedings.  
99 In generation F4, 360 mating pairs were set up in separate vials to allow for one more  
100 generation of intercrossing and to initiate the inbred strains. From generation F5, full-  
101 sibling inbreeding was carried out by mating brother-sister pairs for five subsequent  
102 generations. Throughout all generations (P - F10), the parents were removed before the  
103 offspring hatched to avoid back-crosses. From generation F10 on, RIAILs were kept at low  
104 density in 50 ml vials.

105

106

107

108

109

110

111

112

113

114

115

116

117

118

119

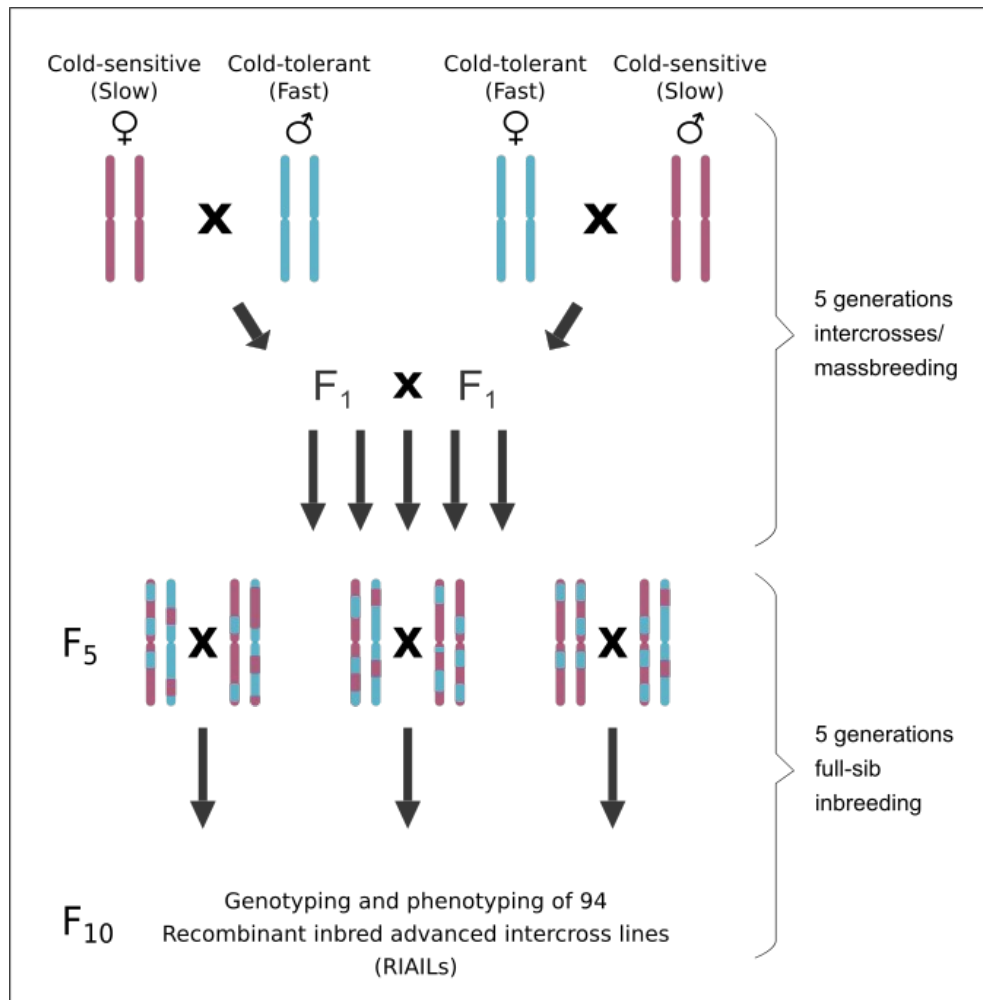

120 **Figure 1.** Crossing scheme for the generation of the RIAIL mapping population. Drawings of single  
121 chromosome pairs were used as representatives for the full genome. An initial, reciprocal cross between  
122 the cold-sensitive founder strain Slow (shown in red) and the cold-tolerant founder strain Fast (shown in  
123 blue) was set up to generate the heterozygous F1 generation. Intercrosses were continued in the form of  
124 massbreedings until generation F4, where single mating pairs were picked to allow for one more  
125 generation of intercrossing and to initiate inbreeding. From generation F5, full-sibling inbreeding was  
126 carried out for five subsequent generations. Throughout all generations (P - F10), the parents were  
127 removed before the offspring hatched to avoid back-crosses.

128

## 129 **Test for chill coma recovery time (CCRT)**

130 CCRT was measured for flies of 4 – 6 days of age as described previously (Königer and  
131 Grath, 2018). For the two founder strains Fast and Slow, CCRT was measured for males  
132 and females separately. For the RIAILs, only female flies were phenotyped. All female flies

133 were collected and phenotyped as virgins. In brief, collection and sex-separation were  
134 carried out under light CO<sub>2</sub>-anesthesia, whereby ten flies from the same sex and strain were  
135 collected into a 50 ml vial containing 10 ml of cornmeal molasses medium. At the age of 4–  
136 6 days, the flies were transferred without anesthesia into new vials without food. For the  
137 cold shock, the vials were placed in an ice water bath ( $0 \pm 0.5$  °C) for exactly 3 h. Back at  
138 room temperature ( $22 \pm 1$  °C), CCRT was monitored in 2 min intervals for the duration of  
139 90 min. Flies that were still not standing after 90 min were assigned a recovery time of 92  
140 min. Flies that died during the experiment ( $< 1$  %) were excluded from the analysis. On  
141 average, we tested 40 female individuals per RIAIL and 100 individuals per founder strain  
142 and sex.

143

#### 144 **DNA extraction and sequencing**

145 DNA was extracted from 94 RIAILs and the two parental strains with the DNeasy® Blood  
146 & Tissue Kit (QIAGEN, Hilden, Germany). For each strain, 10 virgin female individuals  
147 were pooled. DNA concentration and purity were assessed with a spectrophotometer  
148 (NanoDrop® ND 1000, VWR International, Radnor, PA, USA). Library preparation and  
149 double-digest restriction site-associated DNA sequencing (ddRAD-seq) was carried out by  
150 an external sequencing service (ecogenics GmbH, Balgach, Switzerland) in the following  
151 way: DNA was double-digested with EcoRI and MseI and ligated to respective adapters  
152 comprising EcoRI and MseI restriction overhangs. Molecular identifier tags were added by  
153 polymerase chain reaction. The individual sample libraries were pooled, and the resulting  
154 library pools were size-selected for fragments between 500-600 bp with gel electrophoresis

155 and extraction of the respective size range. The resulting size selected library pools were  
156 sequenced on a NextSeq™ 500 Sequencing System (Illumina, San Diego, CA), producing  
157 single-ended reads of 75bp length. Demultiplexing and trimming from Illumina adapter  
158 residuals was also carried out by the external service.

159

## 160 **Marker catalog construction and data curation**

161 The software pipeline Stacks (version 1.45) (Catchen et al., 2011) was used to analyze the  
162 sequence data and to identify markers. First, to examine the quality of the sequence reads,  
163 the *process\_radtags* program was run in Stacks, applying a sliding window size of 50% of  
164 the read length (*-w 0.5*) to filter out reads which drop below a 99% probability of being  
165 correct (Phred score < 20) (*-s 20*). Second, the processed reads of each sample were  
166 mapped to the *D. ananassae* reference genome (FlyBase release 1.05 (Attrill et al., 2016)  
167 with NextGenMap (version 0.5.0) (Sedlazeck et al., 2013). Third, the mapped reads were  
168 converted to bam format, sorted and indexed with samtools (version 0.1.18) (Li et al.,  
169 2009). Fourth, the *ref\_map.pl* wrapper program was run in Stacks, which executes the  
170 Stacks core pipeline by running each of the Stacks components individually. In brief,  
171 *pstacks* assembled RAD loci for each sample, *cstacks* created a catalog of RAD loci from  
172 the two parental samples to create a set of all possible alleles expected in the mapping  
173 population and *sstacks* matched all RIAIL samples against the catalog. The *genotypes*  
174 program was executed last, applying automated corrections to the data (*-c*) to correct for  
175 false-negative heterozygote alleles. Only those loci which were present in at least 80% of  
176 the samples were exported (*-r 75*). Fifth, we applied additional corrections to the catalog by



177 running the *rxstacks* program with the following filtering settings: non-biological  
178 haplotypes unlikely to occur in the population were pruned out (*--prune\_haplo*), SNPs were  
179 recalled once sequencing errors were removed using the bounded SNP model (*--*  
180 *model\_type\_bounded*) with an error rate of 10% (*--bound\_high 0.1*), and catalog loci with  
181 an average log likelihood less than  $-200$  were removed (*--lnl\_lim -200.00*). Sixth, *cstacks*  
182 and *sstacks* and *genotypes* (*-r 75*) were rerun to rebuild, match and export a new catalog  
183 with the filtered SNP calls. *Load\_radtags.pl* and *index\_radtags.pl* were used to upload and  
184 index the new catalog to a MySQL database. Seventh, a custom R script was used to  
185 remove markers with extreme values of residual heterozygosity within RIAILs, using  
186 cutoffs based on our inbreeding scheme ( $> 15\%$  and  $< 35\%$ ) (Falconer and Mackay, 1996)  
187 and to remove markers with an allele frequency drift  $< 10\%$  from further analysis. Eighth,  
188 the MySQL database was used to manually check the markers for errors. A total of 1,400  
189 markers were included in the downstream analysis.

190

### 191 **Genetic map construction**

192 Genetic map construction was conducted with R/qtl (version 1.42) (Broman et al., 2003).  
193 The function *countXO* was used to remove seven RIAILs with  $> 200$  crossover events. One  
194 more RIAIL was removed due to a low number of genotyped markers ( $< 700$ ). The  
195 downstream analysis included 1,400 markers and 86 RIAIL-samples (Supplementary file 1:  
196 Table S3). Markers were partitioned into linkage groups based on a logarithm of the odds  
197 (LOD) score threshold of 8 and a maximum recombination frequency (rf) of 0.35, assuming  
198 a sequencing error rate of 1%. Map distances were calculated using the Haldane map

199 function. As a sanity check, the functions *plotRF* and *checkAlleles* were used to test for  
200 potentially switched alleles and linkage groups were visually validated (based on rf and  
201 LOD scores).

202

### 203 **Analysis of quantitative trait loci (QTL)**

204 QTL mapping was conducted with R/qtl (version 1.42) (Broman et al., 2003). Prior to  
205 mapping, the genotype probabilities between marker positions were calculated with the  
206 function *calc.genoprob* on a maximum grid size of 1 cM. To identify major QTL, standard  
207 interval mapping was performed using the Expectation Maximization (EM) algorithm as  
208 implemented with the *scanone* function. The results are expressed as a LOD score (Sen and  
209 Churchill, 2001). Significance thresholds were calculated with 1,000 genome-wide  
210 permutations. The initial single-QTL scan was extended with a more complex, two-  
211 dimensional scan using Haley-Knott-Regression as implemented with the *scantwo* function.  
212 Significance thresholds were again calculated with 1,000 genome-wide permutations.

213 To screen for additional QTL, estimate QTL effects and refine QTL positions, multiple-  
214 QTL mapping (MQM) was performed (Arends et al., 2010). Here, missing genotypes were  
215 simulated from the joint distribution using a Hidden Markov model with 1,000 simulation  
216 replicates and an assumed error rate of 1% as implemented with the *sim.geno* function. The  
217 MQM model was identified with a forward selection/backward elimination search  
218 algorithm as implemented with the *stepwise* function, with the model choice criterion being  
219 penalized LOD scores. The penalties were derived on the basis of the significance  
220 permutations from the two-dimensional genome scan. To estimate the support interval for

221 each identified QTL, an approximate 95% Bayesian credible interval was calculated as  
222 implemented by the *bayesint* function. Gene annotations for QTL intervals were  
223 downloaded from FlyBase (Attrill et al., 2016) and screened for enriched GO terms and  
224 KEGG pathways with DAVID (version 6.8) (Huang et al., 2009). Enrichment was  
225 calculated against the background of all annotated genes (Attrill et al., 2016) using default  
226 settings (EASE-score of 0.1 after multiple testing correction according to Benjamini-  
227 Hochberg (Benjamini and Hochberg, 1995)). In addition, we cross-referenced the QTL  
228 gene lists with lists of differentially expressed genes from a previously conducted  
229 transcriptome analysis, where we compared gene expression among cold-tolerant and cold-  
230 sensitive fly strains from the Bangkok population (including the two parental founder  
231 strains used in this study) in response to the 3 h cold shock at 0°C (Königer and Grath,  
232 2018). Moreover, the transcriptome analysis also comprises lists of differentially expressed  
233 genes of cold-tolerant and cold-sensitive fly strains of *Drosophila melanogaster* in response  
234 to a cold shock (von Heckel et al., 2016), allowing us to compare expression regulation of  
235 orthologous genes within the QTL regions among these two *Drosophila* species.

236

### 237 **Data Availability**

238 The sequence data have been deposited in NCBI's Sequence Read Archive and are  
239 accessible through series accession number PRJNA544044. Supplementary material is  
240 deposited at figshare.

## 240 Results

### 241 Chill coma recovery time (CCRT) Phenotype

242 The average CCRT of the cold-tolerant founder strain (Fast) was 29.29 min for females and  
243 30.13 min for males. CCRT of the cold-sensitive founder strain (Slow) was 63.70 min for  
244 females and 53.92 min for males (Figure 2, Supplementary file 1: Table S1). The difference  
245 in CCRT between the Fast strain and the Slow strain was significant for males (Welch's t-  
246 test,  $P$ -value  $< 2.2 \times 10^{-16}$ ) and females (Welch's t-test,  $P$ -value  $< 2.2 \times 10^{-16}$ ). The average  
247 CCRT of the RIALs ranged from 27.60 min to 83.03 min (Figure 3, Supplementary file 1:  
248 Table S2).

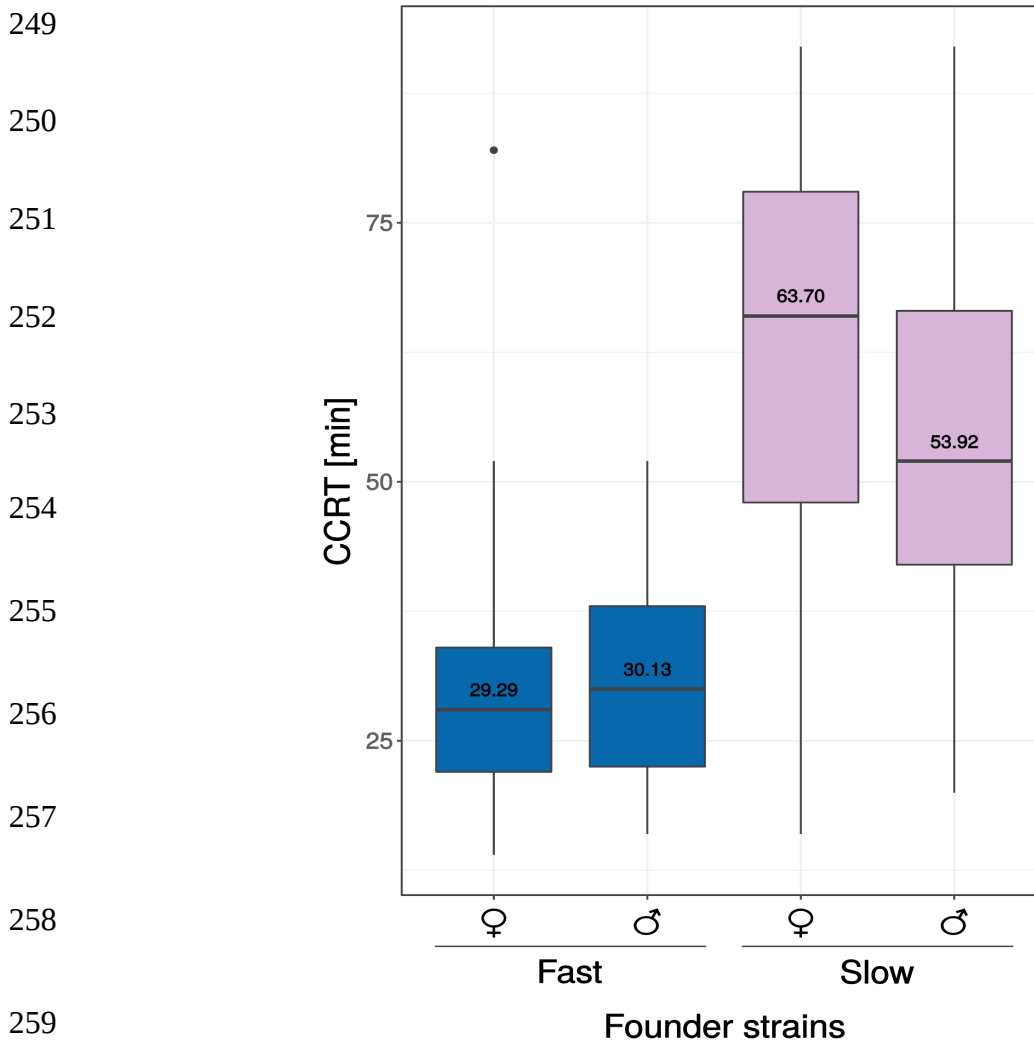

260 **Figure 2.** Chill coma recovery time (CCRT) of 4-6 day old flies of two strains of *D. ananassae* from Bangkok  
261 (Thailand) that were used as founder strains for the mapping population. In both sexes, the Fast strain  
262 recovered significantly faster than the Slow strain (Welch's t-test,  $P$ -value  $< 2.2 \times 10^{-16}$ ).

263

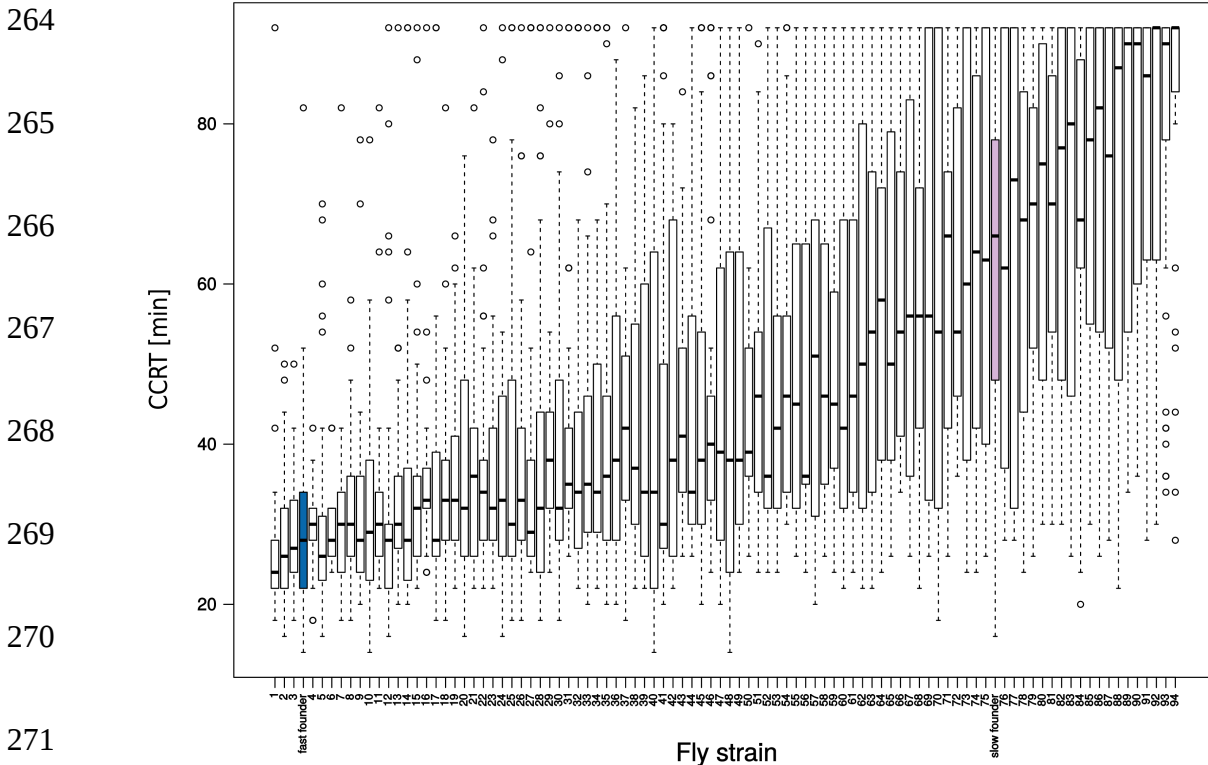

272 **Figure 3.** Chill coma recovery time (CCRT) of 4 - 6 day old virgin female flies of the 94 recombinant  
273 inbred advanced intercross lines (RIAILs) is displayed with white bars. CCRT of the two founder strains  
274 is displayed in blue (Fast founder) and pink (Slow founder) (see also Figure 2). The RIAILs were  
275 numbered in ascending order according to their average CCRT.

276

### 277 Sequencing and genetic map

278 In total, we obtained 331,867,133 sequence reads with an average of 3,281,450 reads per  
279 sample. 0.6% of the total reads (2,074,057) failed the *Stacks process\_radtags* quality check  
280 and were excluded from the analysis. In each of the samples,  $> 94\%$  of all reads mapped to  
281 the *D. ananassae* reference genome. The *Stacks* core pipeline matched 5,468 markers to the  
282 initial catalog. After additional corrections with the *rxstacks* program, 3,092 markers

283 remained. 1,692 more markers were excluded from this new catalog due to extreme values  
284 of heterozygosity and allele frequency drift. Thus, after all filtering steps, a total of 1,400  
285 markers and 86 RIAILs were used for genetic map construction. The markers were  
286 partitioned into eight linkage groups (Supplementary file 1: Table S4). The total map length  
287 was 962.0 cM, with an average marker spacing of 0.7 cM and a maximum marker spacing  
288 of 55.5 cM (Figure 5). Across all samples, 91.6% of the genotypes were available of which  
289 37.4% were homozygous for the cold-tolerant (Fast) allele (FF), 27.9% were heterozygous  
290 (FS) and 34.7% were homozygous for the cold-sensitive (Slow) allele (SS).

291

#### 292 **One- and two-dimensional genome scans**

293 Interval mapping in the context of a single-QTL model revealed two major areas with LOD  
294 peaks which exceeded the permuted 5% significance level (LOD 3.53), one on scaffold  
295 13337 (QTL1) and one on scaffold 13340 (QTL2) (Figure 4). The highest peak on scaffold  
296 13337 was at 6.08 cM (LOD 5.80) and the highest peak on scaffold 13340 was at 80.05 cM  
297 (LOD 4.08).

298

299

300

301

302

303

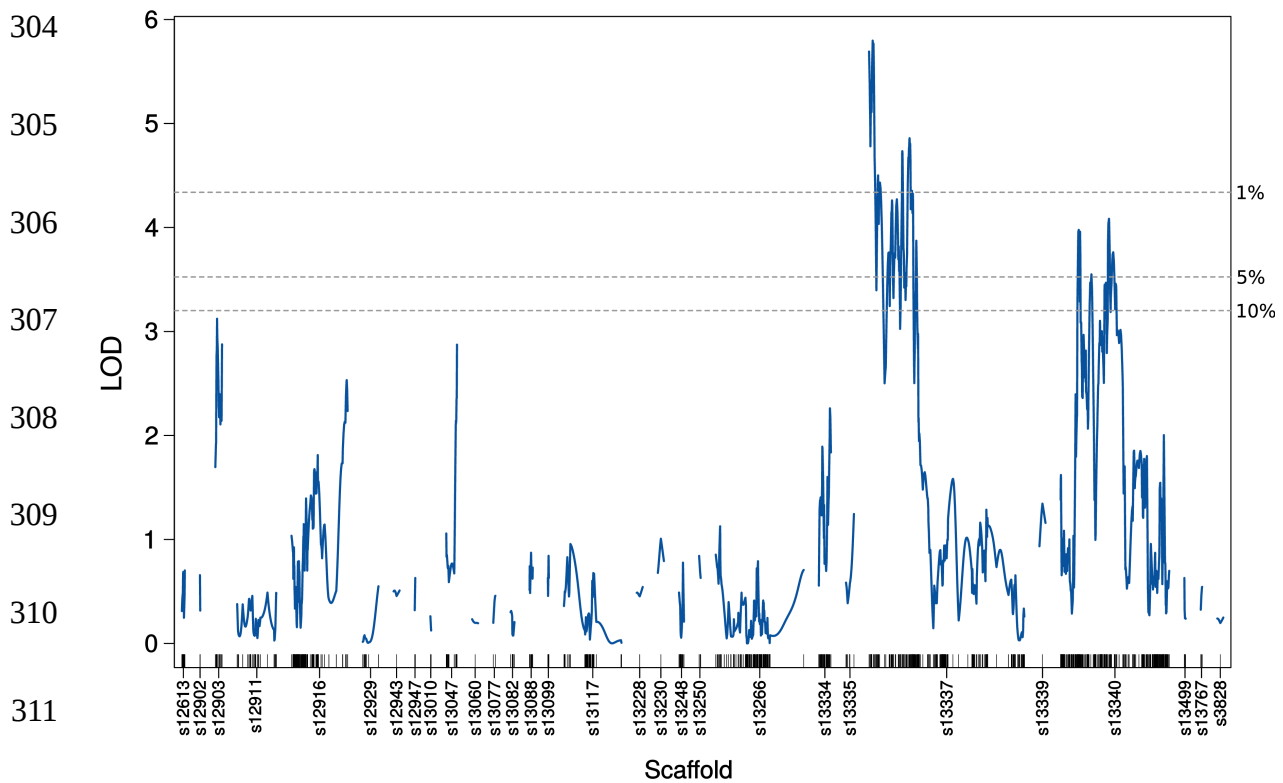

312

313 **Figure 4.** LOD-curves obtained with standard interval mapping reveal two significant QTL, QTL1 on  
314 scaffold 13337 and QTL2 on scaffold 14440. Significance thresholds (dotted lines) were calculated with  
315 1,000 genome-wide permutations. The short vertical lines on the X-axis correspond to the marker  
316 positions.

317

318 The next step was to extend the initial, single-QTL scan with a two-dimensional scan,  
319 where we compared two possible models: the full (epistatic) model ( $H_{f1}$ ) which allowed for  
320 the possibility of a second QTL and interactions among QTL was compared to the additive  
321 model ( $H_{a1}$ ) which allowed for the possibility of a second QTL without interaction. Both the  
322 full and the additive model reached maximum LOD scores at the same positions, 7.08 cM  
323 on scaffold 13337 and 30.1 cM on scaffold 13340 (Table 1). In comparison to the single-  
324 QTL model, we found supporting evidence for the presence of a second QTL under the

325 additive model (lodd.av1  $P$ -value = 0.006), but not under the full model (lod.fv1  $P$ -value =  
 326 0.668). There is no evidence for interaction among the two loci (lod.int  $P$ -value = 1).

327

328 **Table 1.** Results of the two-dimensional genome scan

329 **Two-QTL scan**

|                   | pos1f <sup>1</sup> | pos2f <sup>1</sup> | lod.full <sup>1</sup> | $P$ -value <sup>1*</sup> | lod.fv1 <sup>2</sup> | $P$ -value <sup>2*</sup> |                      |                          |
|-------------------|--------------------|--------------------|-----------------------|--------------------------|----------------------|--------------------------|----------------------|--------------------------|
| 330 s13337:s13340 | 7.08               | 30.1               | 12.6                  | 0                        | 5.77                 | 0.668                    |                      |                          |
|                   | pos1a <sup>3</sup> | pos2a <sup>3</sup> | lod.add <sup>3</sup>  | $P$ -value <sup>3*</sup> | lod.av1 <sup>4</sup> | $P$ -value <sup>4*</sup> | lod.int <sup>5</sup> | $P$ -value <sup>5*</sup> |
| 331 s13337:s13340 | 7.08               | 30.1               | 11.4                  | 0                        | 4.54                 | 0.006                    | 1.24                 | 1                        |

332 1) QTL positions, LOD score and  $P$ -value for the full (epistatic) model versus the Null-model

333 2) LOD score and  $P$ -value for the full (epistatic) model versus the Single-QTL-model

334 3) QTL positions, LOD score and  $P$ -value for the additive model versus the Null-model

335 4) LOD score and  $P$ -value for the additive model versus the Single-QTL-model

336 5) LOD-score and  $P$ -value of (full model – additive model) = evidence for interaction

337 \*)  $P$ -values represent the proportion of permutation replicates with LOD scores  $\geq$  the observed

338

339 **Multilpe-QTL model**

340 In order to identify possible additional QTL of moderate effect, refine QTL positions,

341 separate linked loci and to estimate QTL effects, we applied a forward selection/backward

342 elimination algorithm with penalized LOD scores and identified a model with three main

343 terms and one interaction term. The overall fit of the model had a LOD score of 19.26 and

344 explained 64.34% of the phenotypic variance (Figure S2, Supplementary file 1: Table S5).

345 In comparison to the one- and two-dimensional genome-scans, there was an additional

346 locus on scaffold 12916 at position 16.7 cM (QTL3) which interacted with one of the

347 previously identified loci, on scaffold 13340 (QTL2) (Table 2, Figures 5, 6 and Figure S3).

348



349 **Table 2.** QTL confidence intervals and estimated effects

350

|     | Scaffold | cytologic position [cM] | cytologic position [bp] | confidence interval [bp] | % variance            | additive effect | dominance deviation | genes*  |     |
|-----|----------|-------------------------|-------------------------|--------------------------|-----------------------|-----------------|---------------------|---------|-----|
| 351 | QTL1     | 13337                   | 0.083871                | 0.083871 – 9.233870      | 83.871 – 226.785      | 26.59           | 9.2082              | -2.1719 | 11  |
| 352 | QTL2     | 13340                   | 30.053110               | 27.51427 – 36.52024      | 5.542.036 – 6.544.039 | 30.44           | 1.7317              | -5.2343 | 138 |
|     | QTL3     | 12916                   | 16.747634               | 7.103214 – 92.933043     | 1.514.827 - 2.696.582 | 19.89           | -0.6307             | -0.8054 | 110 |

353 QTL positions and effects on the phenotype as estimated with the multiple-QTL model. Confidence intervals  
354 were calculated as 95% Bayesian credible intervals.

355 \* Numbers of protein-coding genes within QTL intervals. Numbers and identifiers for non-coding genes and  
356 RNAs are shown in Supplementary file 2.

357

358 QTL effects were estimated for additivity ( $((SS-FF)/2)$ ) and deviation from dominance ( $((FS-$   
359  $(FF+SS)/2)$ ), where F denotes the cold-tolerant Fast allele and S denotes the cold-sensitive  
360 Slow allele (Table 2, Supplementary file 1: Table S6). QTL3 on scaffold 12916 was a  
361 transgressive QTL as the cold-tolerant allele was associated with having a more cold-  
362 sensitive phenotype (longer CCRT), resulting in a negative effect size (Figure S1C). For  
363 QTL1, the estimated additive effect was positive while the estimated dominance effect was  
364 negative. RIAILs homozygous for the cold-tolerant allele had the most cold-tolerant  
365 phenotype, RIAILs homozygous for the cold-sensitive allele had the least cold-tolerant  
366 phenotype and heterozygote RIAILs had an intermediate phenotype (Figure S1A). The  
367 effect estimates for QTL2 went in the same direction as for QTL1. Here, however, the  
368 heterozygous phenotype was associated with the most cold-tolerant phenotype (Figure  
369 S1B). The more complex relationships of additive and dominance effects for the interaction  
370 of QTL3 and QTL2 can be understood best by plotting the interaction of the phenotype and  
371 the genotype at both marker positions (Figure 6).

372

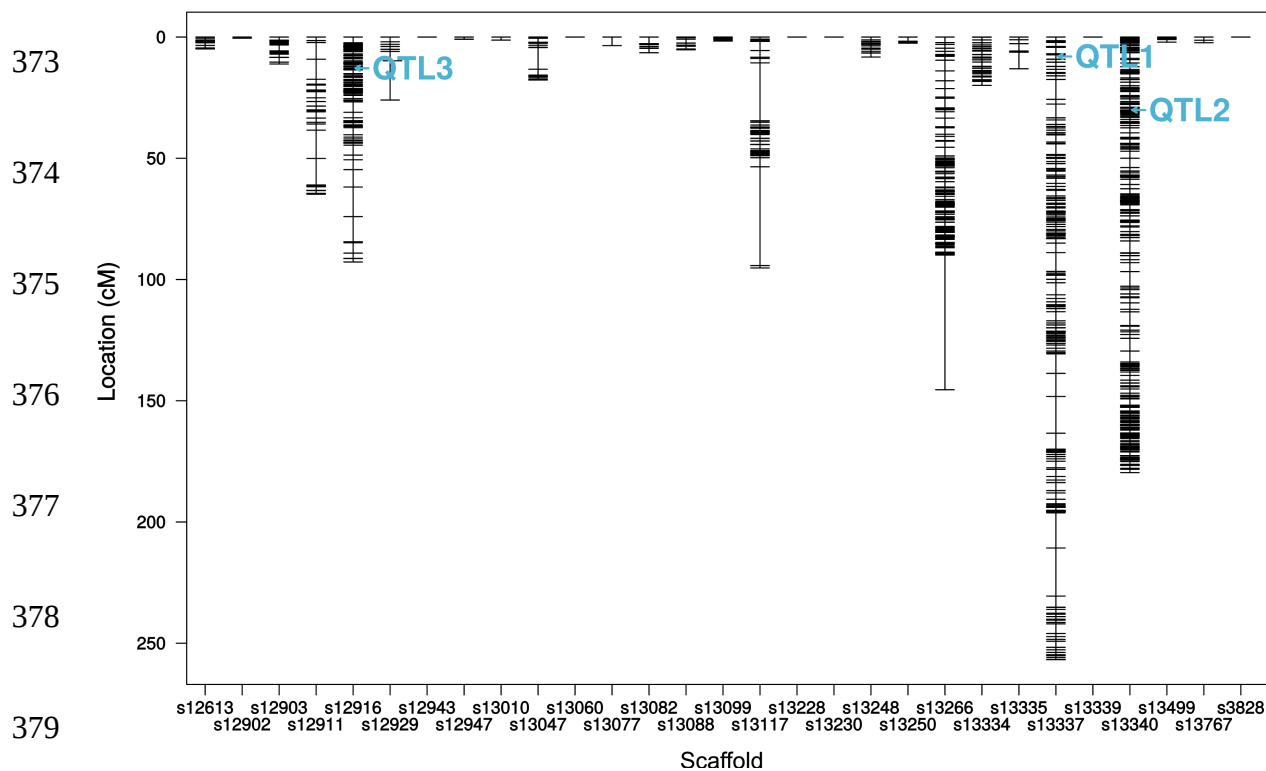

380 **Figure 5.** Genetic map with QTL positions as refined with the multiple-QTL model. X-axis = genomic  
 381 scaffolds. Y-axis = genetic distances in centiMorgan (cM) for markers (short horizontal lines).

382

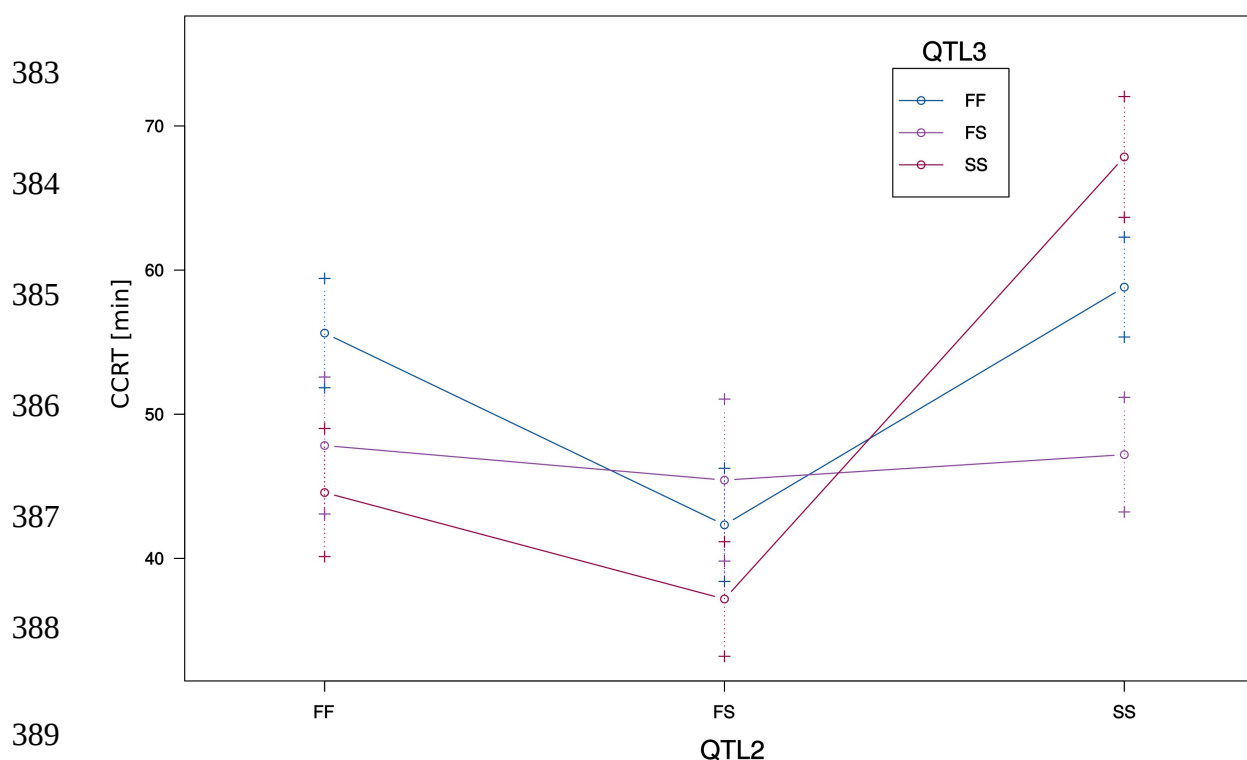

389

390 **Figure 6.** Interaction of QTL2 on scaffold 13340 and QTL3 on scaffold 12916. X-axis = genotypes for  
 391 QTL2. The genotypes for QTL3 are represented by lines in different colors. Error bars are plotted at  $\pm$   
 392 1 SE. F = cold-tolerant parental allele (fast CCR), S = cold-sensitive parental allele (slow CCR).

393 As revealed by the interaction plot (Figure 6), RIALs homozygous for the cold-sensitive  
 394 (S) allele at both QTL also had the most cold-sensitive phenotype. The most cold-tolerant  
 395 phenotype, was reached by those RIALs which were homozygous for the cold-tolerant  
 396 allele at QTL2 but homozygous for the cold-sensitive allele at (the transgressive) QTL3  
 397 Interestingly, cold tolerance of RIALs which were heterozygous at QTL3 seemed to be  
 398 independent from their genotype at QTL2.

399 The results of a drop-one-term at a time ANOVA indicated strong evidence for all three loci  
 400 and the interaction of QTL2 and QTL3: for each QTL, the model with the QTL of interest  
 401 at that particular position was compared to the model with the QTL of interest omitted,  
 402 while all other QTL positions were fixed at their maximum likelihood estimates (Table 3,  
 403 Figure S3).

404

405 **Table 3** Summary table for the drop one term ANOVA

| QTL | cytologic position      | df | Type III SS | LOD    | %Var  | F value | <i>P</i> (Chi2) | <i>P</i> (F) |
|-----|-------------------------|----|-------------|--------|-------|---------|-----------------|--------------|
| 1   | s13337-0.1              | 2  | 4903        | 10.404 | 26.59 | 27.962  | 0               | 8.45E-10     |
| 2   | s13340-30.1             | 6  | 5613        | 11.526 | 30.44 | 10.671  | 0               | 1.52E-08     |
| 3   | s12916-16.7             | 6  | 3667        | 8.277  | 19.89 | 6.972   | 0               | 6.47E-06     |
| 2:3 | s13340-30.1:s12916-16.7 | 4  | 2790        | 6.606  | 15.13 | 7.957   | 0               | 2.11E-05     |

408 S13337-0.1 = QTL on scaffold 13337 at position 0.1 cM, df = degrees of freedom, SS = sums of squares, MS  
 409 = mean squares, LOD = relative to the null model, %Var = proportion of variance in the phenotype explained  
 410 by all terms in the model, *P* (Chi2) = *P*-value based on LOD score following a  $\chi^2$ -distribution, *P*(F) = *P*-  
 411 value based on the F-statistic. Profile LOD scores are shown in Figure S3.

412

413

414

## 415 Candidate gene meta analysis

416 All three QTL together contained 259 protein-coding genes (Table 4, Supplementary file 2:  
417 Tables S1, S2, S5). Among them were 58 genes that we had identified previously as  
418 differentially expressed in response to the cold shock (Königer and Grath, 2018, Table 4).

419

### 420 **Table 4.** Cold tolerance candidate genes within QTL regions

|     | DE genes | Cold tolerance candidate genes                                                                                              |
|-----|----------|-----------------------------------------------------------------------------------------------------------------------------|
| 421 | QTL1     | 3 <i>GF24896</i> (D.mel/ <i>klarsicht</i> , MacMillan et al., 2016)                                                         |
|     | QTL2     | 26 <i>MtnA</i> (D.mel/ <i>MtnA</i> , Catalán et al., 2016), <i>GF17132</i> (D.mel/ <i>CG5246</i> , von Heckel et al., 2018) |
| 422 | QTL3     | 29 <i>GF14829</i> (D.mel/ <i>CG10383</i> , Norry et al. 2008), <i>GF15058</i> (Königer and Grath, 2018)                     |

423 DE genes = differentially expressed genes in response to the cold shock as identified by Königer and  
424 Grath, 2018. DE genes are listed in Supplementary file 2: Tables S1, S2 and S5.

425 Cold tolerance candidate genes = genes previously identified as candidates for cold tolerance in *D.*  
426 *melanogaster*.

427

428 QTL1 spanned 140 kb and contained eleven protein coding genes (Supplementary file 2:  
429 Table S1). There was no enrichment of KEGG pathways or GO terms. However, three of  
430 the eleven genes were previously identified to be differentially expressed in response to a  
431 cold shock (Supplementary file 2: Table S1, (Königer and Grath, 2018). Two of them,  
432 *GF24884* (ortholog of *p130CAS*) and *GF24880* (ortholog of *Phosphoinositide-dependent*  
433 *kinase 1*) were upregulated in both phenotypes after the cold shock and one of them,  
434 *GF24896* (ortholog of *klarsicht*) was exclusively upregulated in the cold-tolerant phenotype  
435 only. Klarsicht was previously reported as upregulated in cold-acclimated flies of *D.*  
436 *melanogaster* (MacMillan et al., 2016).

437 QTL2 spanned 1.0 Mb and contained 138 protein coding genes which were enriched in one  
438 molecular function, “serine-type endopeptidase activity” (GO:0004252) and one biological  
439 process, “intracellular cholesterol transport” (GO:0032367) (Supplementary file 2: Table  
440 S3). Out of the 138 genes, 26 were previously identified as differentially expressed in  
441 response to a cold shock. Among them, nine genes were upregulated and five genes were  
442 downregulated in both phenotypes (see Supplementary file 2: Table S2, and (Königer and  
443 Grath, 2018)). In the cold-tolerant phenotype, one gene, *GF17809* (ortholog of *Archease*)  
444 was exclusively upregulated and one gene, *GF17856* (ortholog of *Niemann-Pick type C-2c*)  
445 was exclusively downregulated. In the cold-sensitive phenotype, one gene, *GF17176*  
446 (ortholog of *aluminum tubes*) was exclusively upregulated and nine genes were exclusively  
447 downregulated (see Supplementary file 2: Table S2, and (Königer and Grath, 2018)).  
448 Nine genes drove the enrichment in the GO category “serine-type endopeptidase activity”  
449 (see Supplementary file 2: Table S3). All of them were located in the downstream region of  
450 QTL2 at 6,515,565 - 6,527,729 bp and adjacent to one another (Figure 7). Seven of these  
451 genes were also differentially expressed in response to cold shock. Among them was  
452 *GF17132*, which was upregulated in both phenotypes and its ortholog in *D. melanogaster*  
453 showed a significant interaction of phenotype and cold shock (Supplementary file 2: Table  
454 S2, von Heckel et al., 2016).

455

456

457

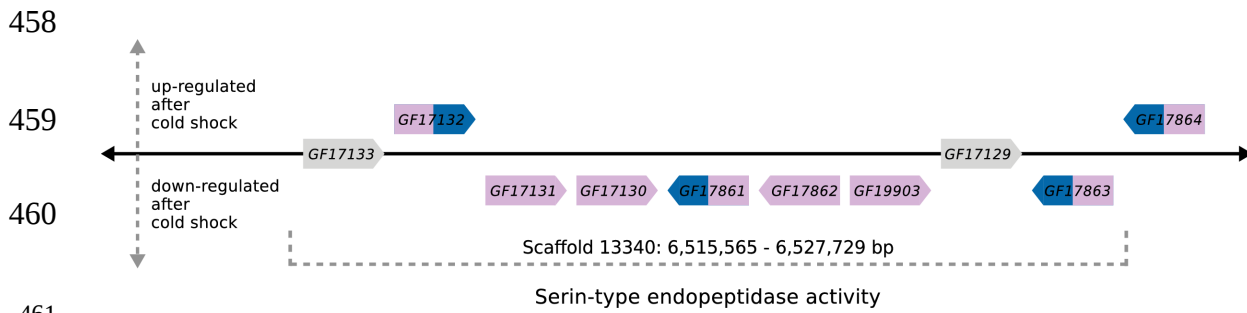

**Figure 7.** Schematic illustration of a genomic region within QTL2 that contains nine genes of the enriched GO category “serine-type endopeptidase activity” (see also Supplementary file 2: Table S2 and S3). Genes were differentially expressed in response to the cold shock in either the cold-sensitive (slow) phenotype alone (genes shown in pink color) or in both phenotypes, cold-sensitive and cold-tolerant (fast) (genes shown in blue and pink color). Genes that were not differentially expressed are shown in grey. Gene lengths and distances between genes are not drawn to scale.

QTL2 also contained the gene *Metallothionein A* (*MtnA*) which caught our attention because it is involved in metal ion homeostasis and in its *D. melanogaster* ortholog, an InDel polymorphism is associated with local adaptation to oxidative stress upon migration out of Sub-Saharan Africa into Europe (Catalán et al., 2016). *MtnA* was downregulated in response to cold in *D. melanogaster* (von Heckel et al., 2016) but not in *D. ananassae* (Königer and Grath, 2018).

QTL3 spanned 1.2 Mb and contained 110 protein coding genes which were enriched in three molecular functions: “sequence-specific DNA binding” (GO:0043565), “ATPase activity” (GO:0016887) and “phosphotransferase activity, alcohol group as acceptor” (GO:0016773) and one KEGG pathway: “Hippo signaling pathway – fly” (dan04391) (Supplementary file 2: Table S6). Out of the 110 genes, 29 were previously identified as differentially expressed in response to a cold shock (Table 4). Among them, 12 genes were upregulated and seven genes were downregulated in both phenotypic groups, cold-tolerant

482 and cold-sensitive (see Supplementary file 2: Table S5, (Königer and Grath, 2018)). In the  
483 cold-tolerant phenotype, two genes, *GF15043* (ortholog of *CG31974*) and *GF14846*  
484 (ortholog of *bicoid stability factor*) were exclusively upregulated and two genes, *GF15020*  
485 (ortholog of *ABC transporter expressed in trachea*) and *GF14865* (ortholog of *CG11454*)  
486 were exclusively downregulated. In the cold-sensitive phenotype, five genes were  
487 exclusively downregulated but there were no exclusively upregulated genes. One of the five  
488 downregulated genes was *GF15058* (ortholog of *CG10178*), which was one out of two  
489 genes with a significant interaction of phenotype and cold shock. The function of *GF15058*  
490 is unknown but it is predicted to have UDP-glycosyl-transferase-activity (Marchler-Bauer  
491 et al., 2015).

492

493

494

495

496

497

498

499

500

501

## 502 **Discussion**

503 We used a panel of 86 recombinant inbred advanced intercross lines (RIAILs) and 1,400  
504 ddRAD markers to map QTL that underlie natural variation in cold tolerance among two fly  
505 strains of *D. ananassae* from a population in Bangkok, Thailand. The recovery time  
506 segregated significantly between the two founder strains. CCRT in the cold-sensitive strain  
507 was about twice as high as in the cold-tolerant strain. This observation was of particular  
508 interest to us because in *D. melanogaster*, previous studies found such differences in the  
509 CCRT phenotype only among different populations that inhabit different thermal habitats  
510 (David et al., 1998; von Heckel et al., 2016).

511 The CCRT phenotypes of the mapping population were distributed on a continuum (Figure  
512 3), which was a first important indicator that we were looking at more than one dominant  
513 causal allele. Furthermore, three RIAILs recovered faster than the Fast parental strain and  
514 19 of the RIAILs recovered slower than the Slow parental strain, indicating that there was  
515 interaction among the parental alleles or loci in the recombinant genotypes of the mapping  
516 population.

517 The three identified QTL for CCRT explain as much as 64% of the variance in the  
518 phenotype. This proportion is equal to a previous mapping experiment for CCRT in *D.*  
519 *melanogaster*, in which three QTL explained 64% of the variance for CCRT in an  
520 intercontinental set of recombinant inbred lines (Norry et al., 2008). The founder strains for  
521 this mapping population were sampled from Denmark and Australia and thus from two  
522 geographically different thermal environments. Another study (Morgan and Mackay, 2006)



523 also identified three QTL for CCRT in *D. melanogaster* in a set of recombinant inbred lines  
524 derived from two laboratory strains that differed significantly for the phenotype. In this  
525 mapping population, the three loci explained 25% of the phenotypic variance for CCRT.  
526 While two of the reported QTL for CCRT in *D. melanogaster* co-localized across these two  
527 studies, none of the reported candidate genes co-localize with the QTL intervals in *D.*  
528 *ananassae* (this study).

529 It needs to be noted that, in general, QTL confidence intervals should be considered as  
530 support regions rather than absolute boundaries (Broman and Sen, 2009). Further, the  
531 causal genetic variants may be located anywhere within these intervals.

532 Compared to sequencing of pooled samples (Pool-sequencing), RAD-based approaches  
533 come at the cost of marker density, especially in crossing designs with low genetic  
534 differentiation between the founder strains and low levels of linkage disequilibrium  
535 (Futschik and Schlötterer, 2010). Thus, to increase the mapping resolution and to expand  
536 the genetic map, we generated a mapping population in which five generations of  
537 intercrosses allowed for a sufficient number of crossover events (Pollard, 2012).  
538 Subsequently, we used stringent cutoffs for potential sequencing errors and distorted loci.

539 This step certainly increased the robustness of the identified loci, but came at the cost of  
540 chromosomal coverage, as many smaller genomic scaffolds were excluded from the  
541 analysis at this step. It is therefore possible that our results do not cover all potential QTL.

542 However, the reduction of genome complexity that results from RAD-sequencing has two  
543 major benefits. First, it is more cost-effective than whole-genome sequencing of individual  
544 samples, allowing for a larger number of samples to be analyzed and consequently for

545 greater statistical power to detect QTL. Second, it is more accurate than whole-genome  
546 Pool-sequencing (Catchen et al., 2017; Cutler and Jensen, 2010).

547 Combining the identified intervals with two previous transcriptome analyses in *D.*  
548 *ananassae* (Königer and Grath, 2018) and *D. melanogaster* (von Heckel et al., 2016) and  
549 additional cold tolerance studies in *D. melanogaster* (MacMillan et al., 2016; Norry et al.,  
550 2008; Ramnarine et al., 2019) allowed us to narrow down the list of potentially causal  
551 genes in *D. ananassae* and to identify common candidate genes in both species. From the  
552 combined data, we identified three types of candidates:

553 **D)** The expression profile of *GF15058* (*D.mel/CG10178*) in QTL3 is directly associated  
554 with a difference in the CCRT phenotype in *D. ananassae*. *GF15058* was one out of two  
555 genes that responded to the cold shock in a phenotype-specific way (Königer and Grath,  
556 2018). Its function was inferred from electronic annotation to be uridine diphosphate (UDP)  
557 glycosyltransferase activity. UDP-glycosyltransferases (UGTs) are membrane-bound  
558 enzymes that are located in the endoplasmic reticulum and catalyze the addition of a  
559 glycosyl group from a uridine triphosphate (UTP) sugar to a small hydrophobic molecule.  
560 Therefore, UGTs play an essential role in maintaining homeostatic function and  
561 detoxification and are known as major members of phase II drug metabolizing enzymes  
562 (Bock, 2015). The cold shock led to a downregulation of *GF15058* in the Slow strains but  
563 not in the Fast strains. However, the Fast genotype at QTL3 is transgressive, i.e., it  
564 increases CCRT. Thus, if *GF15058* was indeed one of the causal factors, our results suggest  
565 that keeping transcript abundance at a constant level after the cold shock is so costly for the  
566 organism that it slows down recovery.

567 **II)** The expression profile of *GF17132* (*D.mel/CG5246*) in QTL2 is directly associated with  
568 a difference in the CCRT phenotype in *D. melanogaster*, where it showed a significant  
569 interaction of phenotype and cold shock (von Heckel et al., 2016). It was also differentially  
570 expressed in response to the cold shock in *D. ananassae* (Königer and Grath, 2018).  
571 Moreover, *GF17132* belongs to a cluster of genes that code for serine peptidases in QTL2  
572 (Figure 7). Serine peptidases are involved in proteolysis, i.e., they catalyze the hydrolysis of  
573 peptide bonds (Attrill et al., 2016; Ross et al., 2003). This process plays a central role in the  
574 immune response of insects (De Gregorio et al., 2001) and serine proteases were suggested  
575 previously to be involved in the cold stress response as well (Vermeulen et al., 2013).

576 **III)** We identified three more genes that have been associated with thermotolerance in  
577 experiments other than the transcriptome analyses: *MtnA* (*D.mel/MtnA*), *GF24896*  
578 (*D.mel/klarsicht*) and *GF14829* (*D.mel/CG10383*).

579 The gene *MtnA* in QTL2 codes for metallothionein A which promotes resistance to  
580 oxidative stress. It binds heavy metals and neutralizes reactive oxygen and nitrogen species  
581 (Ruttkay-Nedecky et al., 2013). Exposure to cold leads to an increased abundance of free  
582 radicals, thereby inducing oxidative stress (Williams et al., 2014). In *D. melanogaster*, a 49  
583 bp deletion in the 3'UTR of *MtnA* is associated with its transcriptional upregulation and  
584 with increased tolerance to oxidative stress (Catalán et al., 2016). The frequency of this  
585 polymorphism in natural populations follows latitudinal clines, suggesting that upregulation  
586 of *MtnA* is favored in temperate environments (Ramnarine et al., 2019). However, a direct  
587 link between cold stress and oxidative stress is yet to be established in drosophilids  
588 (Plantamp et al., 2016). *MtnA* was downregulated after the cold shock in both phenotypes

589 of *D. melanogaster* (von Heckel et al., 2016) and not differentially expressed in *D.*  
590 *ananassae*. Moreover, a previous sequence analysis of *MtnA* in *D. ananassae* reported the  
591 3'UTR deletion polymorphism as absent in 110 strains that were sampled in tropical and  
592 temperate regions around the world (Stephan et al., 1994).

593 The gene *GF24896* (*D.mel/klarsicht*) in QTL1 is expressed in a wide range of tissues,  
594 where it interacts with microtubules and promotes evenly spaced positioning of nuclei.  
595 Knock-out of *klarsicht* in muscle cells impairs locomotion and flight (Elhanany-Tamir et  
596 al., 2012) – functions that are also disabled during chill coma. The gene was reported  
597 previously to be upregulated with cold-acclimation in *D. melanogaster* (MacMillan et al.,  
598 2016). In *D. ananassae*, *GF24896* is upregulated after the cold shock in Fast strains but not  
599 in Slow strains (Königer and Grath, 2018), suggesting a potential contribution of this gene  
600 to faster recovery from cold exposure.

601 Lastly, the gene *GF14829* (*D.mel/CG10383*) in QTL3 is involved in the regulation of  
602 glycosylphosphatidylinositol metabolism. After the cold shock, it is upregulated in Fast and  
603 Slow strains of *D. ananassae* and in Slow strains of *D. melanogaster*. Interestingly, over-  
604 expression of *CG10383* increases lifespan in *D. melanogaster* (Paik et al., 2012). It was  
605 also the only gene within all three QTL for CCRT in *D. ananassae* that mapped to a heat-  
606 tolerance QTL in *D. melanogaster* (Norry et al., 2008). In the face of the transgressive  
607 nature of QTL3, potential allelic effects resulting in trade-offs between CCRT, heat-  
608 resistance and lifespan should be investigated in both species.

609 In conclusion, we identified three large-effect QTL for recovery from cold exposure in *D.*  
610 *ananassae*. Combining the present results with previous results obtained from *D.*

611 *melanogaster* allowed us to shed light on commonalities and differences in the genetic basis  
612 of cold tolerance between these two species from different phylogenetic lineages that have  
613 independently expanded their thermal ranges and became successful human commensals.  
614 The combined data point at the five above mentioned genes as candidates for recovery from  
615 cold exposure. These genes serve as the groundwork for more detailed analyses such as  
616 loss-of-function experiments to establish a link between genotype and phenotype in both  
617 species.  
618

## 619 References

- Arends, D., Prins, P., Jansen, R.C., and Broman, K.W. (2010). R/qtl: high-throughput multiple QTL mapping. *Bioinforma. Oxf. Engl.* *26*, 2990–2992.
- Attrill, H., Falls, K., Goodman, J.L., Millburn, G.H., Antonazzo, G., Rey, A.J., and Marygold, S.J. (2016). FlyBase: establishing a Gene Group resource for *Drosophila melanogaster*. *Nucleic Acids Res.* *44*, D786–D792.
- Benjamini, Y., and Hochberg, Y. (1995). Controlling the False Discovery Rate: A Practical and Powerful Approach to Multiple Testing. *J. R. Stat. Soc. Ser. B Methodol.* *57*, 289–300.
- Bock, W. (2015). The UDP-glycosyltransferase (UGT) superfamily expressed in humans, insects and plants: Animal-plant arms-race and co-evolution. *Biochem. Pharmacol.* *99*.
- Broman, K., and Sen, S. (2009). *A Guide to QTL Mapping with R/qtl* (New York: Springer-Verlag).
- Broman, K.W., Wu, H., Sen, S., and Churchill, G.A. (2003). R/qtl: QTL mapping in experimental crosses. *Bioinforma. Oxf. Engl.* *19*, 889–890.
- Catalán, A., Glaser-Schmitt, A., Argyridou, E., Duchen, P., and Parsch, J. (2016). An Indel Polymorphism in the MtnA 3' Untranslated Region Is Associated with Gene Expression Variation and Local Adaptation in *Drosophila melanogaster*. *PLoS Genet.* *12*.
- Catchen, J.M., Amores, A., Hohenlohe, P., Cresko, W., and Postlethwait, J.H. (2011). Stacks: Building and Genotyping Loci De Novo From Short-Read Sequences. *G3 GenesGenomesGenetics* *1*, 171–182.
- Catchen, J.M., Hohenlohe, P.A., Bernatchez, L., Funk, W.C., Andrews, K.R., and Allendorf, F.W. (2017). Unbroken: RADseq remains a powerful tool for understanding the genetics of adaptation in natural populations. *Mol. Ecol. Resour.* *17*, 362–365.
- Cutler, D.J., and Jensen, J.D. (2010). To Pool, or Not to Pool? *Genetics* *186*, 41–43.
- Das, A., Mohanty, S., and Stephan, W. (2004). Inferring the Population Structure and Demography of *Drosophila ananassae* From Multilocus Data. *Genetics* *168*, 1975–1985.
- David, J.R., and Capy, P. (1988). Genetic variation of *Drosophila melanogaster* natural populations. *Trends Genet. TIG* *4*, 106–111.
- David, J., Gibert, P., Pla, E., Petavy, G., Karan, D., and Moreteau, B. (1998). Cold stress tolerance in *Drosophila*: Analysis of chill coma recovery in *D. Melanogaster*. *J. Therm. Biol.* *23*, 291–299.

De Gregorio, E., Spellman, P.T., Rubin, G.M., and Lemaitre, B. (2001). Genome-wide analysis of the *Drosophila* immune response by using oligonucleotide microarrays. *Proc. Natl. Acad. Sci. U. S. A.* *98*, 12590–12595.

Drosophila 12 Genomes Consortium, Clark, A.G., Eisen, M.B., Smith, D.R., Bergman, C.M., Oliver, B., Markow, T.A., Kaufman, T.C., Kellis, M., Gelbart, W., et al. (2007). Evolution of genes and genomes on the *Drosophila* phylogeny. *Nature* *450*, 203.

Falconer, and Mackay (1996). *Introduction to Quantitative Genetics* (Edinburgh/London: Oliver & Boyd).

von Heckel, K., Stephan, W., and Hutter, S. (2016). Canalization of gene expression is a major signature of regulatory cold adaptation in temperate *Drosophila melanogaster*. *BMC Genomics* *17*.

Huang, D.W., Sherman, B.T., and Lempicki, R.A. (2009). Systematic and integrative analysis of large gene lists using DAVID bioinformatics resources. *Nat. Protoc.* *4*, 44–57.

Königer, and Grath (2018). Transcriptome analysis reveals candidate genes for cold tolerance in *Drosophila ananassae*. *Genes (Basel)* *12*;9(12).

Lachaise, D., Cariou, M.-L., David, J.R., Lemeunier, F., Tsacas, L., and Ashburner, M. (1988). Historical Biogeography of the *Drosophila melanogaster* Species Subgroup. In *Evolutionary Biology*, M.K. Hecht, B. Wallace, and G.T. Prance, eds. (Boston, MA: Springer US), pp. 159–225.

Li, H., Handsaker, B., Wysoker, A., Fennell, T., Ruan, J., Homer, N., Marth, G., Abecasis, G., Durbin, R., and 1000 Genome Project Data Processing Subgroup (2009). The Sequence Alignment/Map format and SAMtools. *Bioinforma. Oxf. Engl.* *25*, 2078–2079.

MacMillan, H.A., Knee, J.M., Dennis, A.B., Udaka, H., Marshall, K.E., Merritt, T.J.S., and Sinclair, B.J. (2016). Cold acclimation wholly reorganizes the *Drosophila melanogaster* transcriptome and metabolome. *Sci. Rep.* *6*, 28999.

Marchler-Bauer, A., Derbyshire, M.K., Gonzales, N.R., Lu, S., Chitsaz, F., Geer, L.Y., Geer, R.C., He, J., Gwadz, M., Hurwitz, D.I., et al. (2015). CDD: NCBI's conserved domain database. *Nucleic Acids Res.* *43*, D222-226.

Morgan, T.J., and Mackay, T.F.C. (2006). Quantitative trait loci for thermotolerance phenotypes in *Drosophila melanogaster*. *Heredity* *96*, 232–242.

Norry, F.M., Scannapieco, A.C., Sambucetti, P., Bertoli, C.I., and Loeschcke, V. (2008). QTL for the thermotolerance effect of heat hardening, knockdown resistance to heat and chill-coma recovery in an intercontinental set of recombinant inbred lines of *Drosophila melanogaster*. *Mol. Ecol.* *17*, 4570–4581.

Paik, D., Jang, Y.G., Lee, Y.E., Lee, Y.N., Yamamoto, R., Gee, H.Y., Yoo, S., Bae, E., Min, K.-J., Tatar, M., et al. (2012). Misexpression screen delineates novel genes controlling *Drosophila* lifespan. *Mech. Ageing Dev.* *133*, 234–245.

Plantamp, C., Salort, K., Gibert, P., Dumet, A., Mialdea, G., Mondy, N., and Voituron, Y. (2016). All or nothing: Survival, reproduction and oxidative balance in Spotted Wing *Drosophila* (*Drosophila suzukii*) in response to cold. *J. Insect Physiol.* *89*, 28–36.

Ramnarine, T.J.S., Glaser-Schmitt, A., Catalán, A., and Parsch, J. (2019). Population Genetic and Functional Analysis of a cis-Regulatory Polymorphism in the *Drosophila melanogaster* Metallothionein A gene. *Genes* *10*.

Ross, J., Jiang, H., Kanost, M.R., and Wang, Y. (2003). Serine proteases and their homologs in the *Drosophila melanogaster* genome: an initial analysis of sequence conservation and phylogenetic relationships. *Gene* *304*, 117–131.

Ruttkay-Nedecky, B., Nejdil, L., Gumulec, J., Zitka, O., Masarik, M., Eckschlager, T., Stiborova, M., Adam, V., and Kizek, R. (2013). The Role of Metallothionein in Oxidative Stress. *Int. J. Mol. Sci.* *14*, 6044–6066.

Sedlazeck, F.J., Rescheneder, P., and von Haeseler, A. (2013). NextGenMap: fast and accurate read mapping in highly polymorphic genomes. *Bioinformatics* *29*, 2790–2791.

Sen, S., and Churchill, G.A. (2001). A statistical framework for quantitative trait mapping. *Genetics* *159*, 371–387.

Stephan, W., and Li, H. (2007). The recent demographic and adaptive history of *Drosophila melanogaster*. *Heredity* *98*, 65–68.

Stephan, W., Rodriguez, V.S., Zhou, B., and Parsch, J. (1994). Molecular evolution of the metallothionein gene Mtn in the melanogaster species group: results from *Drosophila ananassae*. *Genetics* *138*, 135–143.

Svetec, N., Werzner, A., Wilches, R., Pavlidis, P., Alvarez-Castro, J.M., Broman, K.W., Metzler, D., and Stephan, W. (2011). Identification of X-linked quantitative trait loci affecting cold tolerance in *Drosophila melanogaster* and fine mapping by selective sweep analysis. *Mol. Ecol.* *20*, 530–544.

Tobari, Y.N. (1993). *Drosophila ananassae*: genetical and biological aspects (Tokyo; Basel; New York: Japan Scientific Societies Press ; Karger).

Vermeulen, C.J., Sørensen, P., Gagalova, K.K., and Loeschcke, V. (2013). Transcriptomic analysis of inbreeding depression in cold-sensitive *Drosophila melanogaster* shows upregulation of the immune response. *J. Evol. Biol.* *26*, 1890–1902.



Williams, C., Watanabe, M., Guarracino, M., Ferraro, M., Edison, A., Morgan, T., Boroujerdi, A., and Hahn, D. (2014). Cold adaptation shapes the robustness of metabolic networks in *Drosophila melanogaster*. *Evol. Int. J. Org. Evol.* 68, 3505–3523.
